## CORRECTION

# Correction: ChtVis-Tomato, a genetic reporter for *in vivo* visualization of chitin deposition in *Drosophila*

Lukasz F. Sobala, Ying Wang and Paul N. Adler

There was an error published in Development **142**, 3974-3981.

In the Materials and Methods, it was stated that the pWalium-ChtVis-Tomato plasmid is available from Addgene (72102). The plasmid number was incorrect and should have been 67756.

This error does not affect the conclusions of the paper. The authors apologise to readers for this mistake.
